1 **Estimated pediatric SARS-CoV-2 seroprevalence in Arkansas over the first year of the**  
2 **COVID-19 pandemic**

3 Karl W. Boehme, PhD<sup>1,2,3#</sup>, Joshua L. Kennedy, MD<sup>4,5,6,#</sup>, Jessica Snowden, MD<sup>4</sup>, Shana M.  
4 Owens, PhD<sup>1</sup>, Marianne Kouassi, BS<sup>1</sup>, Ryan L. Mann, BS<sup>1</sup>, Amairani Paredes, BS<sup>1</sup>, Claire Putt,  
5 BA<sup>4</sup>, Laura James, MD<sup>4</sup>, Jing Jin, MPH<sup>7</sup>, Ruofei Du, PhD<sup>7</sup>, Catherine Kirkpatrick, BS<sup>6</sup>, Zeel  
6 Modi, BA<sup>5</sup>, Katherine Caid, BS<sup>5</sup>, Namvar Zohoori, MD, MPH, PhD<sup>7,8</sup>, Atul Kothari, MD<sup>5,8,9</sup>,  
7 Bobby L. Boyanton, Jr., MD<sup>10</sup>, and J. Craig Forrest, PhD<sup>1,2,3</sup>

8  
9 <sup>1</sup> Department of Microbiology & Immunology, College of Medicine, University of Arkansas for  
10 Medical Sciences, Little Rock, AR

11 <sup>2</sup> Center for Microbial Pathogenesis and Host Inflammatory Responses, University of Arkansas  
12 for Medical Sciences, Little Rock, AR

13 <sup>3</sup> Winthrop P. Rockefeller Cancer Institute, University of Arkansas for Medical Sciences, Little  
14 Rock, AR

15 <sup>4</sup> Department of Pediatrics, College of Medicine, University of Arkansas for Medical Sciences,  
16 Little Rock, AR

17 <sup>5</sup> Department of Internal Medicine, College of Medicine, University of Arkansas for Medical  
18 Sciences, Little Rock, AR

19 <sup>6</sup> Arkansas Children's Research Institute, Little Rock, AR.

20 <sup>7</sup> Department of Biostatistics, College of Public Health, University of Arkansas for Medical  
21 Sciences, Little Rock, AR

22 <sup>8</sup> Arkansas Department of Health, Little Rock, AR.

23 <sup>9</sup> Department of Bioinformatics, College of Medicine, University of Arkansas for Medical  
24 Sciences, Little Rock, AR

25 <sup>10</sup> Departments of Pathology, Arkansas Children's Hospital and University of Arkansas for  
26 Medical Sciences, Little Rock, AR

27  
28 #These authors contributed equally to the work.

29  
30 ‡ Correspondence to:

31 Karl W. Boehme

32 Mailing address: 4301 W. Markham Dr. #511, Little Rock, AR 72205

33 Phone: (501) 686-5189

34 Email: [kwboehme@uams.edu](mailto:kwboehme@uams.edu)

35  
36 J. Craig Forrest

37 Mailing address: 4301 W. Markham Dr. #511, Little Rock, AR 72205

38 Phone: (501)

39 Email: [jcforrest@uams.edu](mailto:jcforrest@uams.edu)

40  
41 Joshua L. Kennedy

42 Mailing address: 13 Children's Way, Slot 512-13, Little Rock, AR 72205

43 Phone: (501) 364-1060

44 Email: [jlkenedy@uams.edu](mailto:jlkenedy@uams.edu)

45  
46 Running Title: Pediatric SARS-CoV-2 seroprevalence in Arkansas

47 Keywords: COVID-19, SARS-CoV2, serology, antibody, child, epidemiology

48 **ABSTRACT**

49 **Importance:** As vaccines for children under the age of 12 are not yet approved, determining the  
50 SARS-CoV-2 infection rate in children is important for decisions about protective measures to  
51 be taken during the 2021–2022 school year.

52  
53 **Objective:** To estimate the prevalence of SARS-CoV-2 antibodies in residual serum samples  
54 from pediatric patients in the state of Arkansas over the first year of the COVID-19 pandemic as  
55 an indicator of SARS-CoV-2 infection rates in children.

56  
57 **Design:** The study is a survey of SARS-CoV-2 seropositivity in children in Arkansas over the  
58 first year of the COVID-19 pandemic. From April 2020 through April 2021, remnant serum  
59 samples were collected across five time periods (waves): April 2–May 6, June 6–August 10,  
60 September 8–October 17, November 7–December 17, 2020 and April 5–April 28, 2021.

61  
62 **Setting:** The multi-site survey collected remnant serum samples from four clinics across the  
63 state of Arkansas: Arkansas Children’s Hospital (ACH, Little Rock, AR), Arkansas Children’s  
64 Northwest (Springdale, AR), and UAMS Family Medical Centers (Ft. Smith, AR and Pine Bluff,  
65 AR)

66  
67 **Participants:** The study population consisted of 2400 convenience serum samples from  
68 children ages 1–18 who visited hospitals or regional clinics in Arkansas for non-COVID19-  
69 related reasons.

70  
71 **Exposures:** Infection with SARS-CoV-2.

72

73 **Main outcomes and measures:** The presence of IgM and/or IgG antibodies to the SARS-CoV-  
74 2 Spike and Nucleoprotein were determined using a two-step enzyme-linked immunosorbent  
75 assay. Seroprevalence was estimated by demographic group, including age (1-4, 5-9, 10-14,  
76 and 15-18 years), sex, race/ethnicity (white, black, Hispanic), metropolitan status, SARS-CoV-2  
77 PCR testing, and co-morbidities (respiratory virus infection within 6 months, asthma,  
78 hypertension, obesity, diabetes, autoimmune disease). Association with SARS-CoV-2 antibody  
79 reactivity was determined by demographic group.

80

81 **Results:** The overall SARS-CoV-2 seroprevalence rose from 7.9% in Wave 1 (95%CI, 4.9-  
82 10.9%) to 25.8% in Wave 5 (95% CI, 22.2-29.3%), as did the age- and sex-standardized  
83 seroprevalence rate which ranged from 8.6% in Wave 1 (95%CI, 5.1-11.1%) to 24.2% in Wave  
84 5 (95% CI, 20.1-28.2%). Hispanic children had a significantly higher risk of testing positive for  
85 SARS-CoV-2 antibodies than non-Hispanic white children in Wave 3 (RR 2.82, 95% CI, 1.81-  
86 4.38), Wave 4 (RR 1.76, 95% CI, 1.03-3.00), and Wave 5 (RR 2.37, 95% CI, 1.69-3.33)  
87 Similarly, black children also showed a significantly higher risk of testing positive for SARS-CoV-  
88 2 antibodies than white children in Wave 3 (RR 1.71, 95% CI, 1.03-2.84) and Wave 5 (RR 1.59,  
89 95% CI, 1.08-2.34).

90

91 **Conclusions and relevance:** The percentage of Arkansas children with SARS-CoV-2-specific  
92 antibodies increased from April 2020 to April 2021. These data indicate that many more children  
93 have been infected with SARS-CoV-2 than indicated by diagnostic testing. With the emergence  
94 of SARS-CoV-2 variants, recognition of long-term effects of SARS-CoV-2 even after mild or  
95 asymptomatic infections, and the lack of an authorized pediatric SARS-CoV-2 vaccine, these  
96 results highlight the importance of including children in SARS-CoV-2 public health, clinical care,  
97 and research strategies. These findings are important for state and local officials as they

- 98 consider measures to limit SARS-CoV-2 spread in schools and daycares for the 2021–2022
- 99 school year.

## 100 INTRODUCTION

101 Severe acute respiratory syndrome coronavirus-2 (SARS-CoV-2) emerged in late 2019  
102 and spread globally to cause the coronavirus disease of 2019 (COVID-19) pandemic.<sup>1,2</sup> SARS-  
103 CoV-2 has infected nearly 200 million and killed more than 4 million people worldwide, causing  
104 massive disruptions to daily life and untold economic losses.<sup>3</sup> SARS-CoV-2 was first detected in  
105 the United States in early 2020 and has caused over 600,000 deaths.<sup>4-6</sup> Children were thought  
106 to be important for driving SARS-CoV-2 transmission.<sup>7,8</sup> In March 2020, schools nationwide  
107 closed for in-person instruction and classes moved online to curtail SARS-CoV-2 spread.<sup>7,8</sup>  
108 However, pediatric infection rates, and thereby the potential level of immunity in children, is not  
109 known.<sup>9,10</sup> Because approval of SARS-CoV-2 vaccines for those 12 years and under is not  
110 expected until late 2021, knowing infection rates in children is important information for school  
111 officials as they consider risks and protection measures for the 2021–2022 school year.

112 Children typically experience less severe COVID-19 and may be more likely to have  
113 asymptomatic infections, allowing them to unknowingly spread SARS-CoV-2.<sup>11</sup> With  
114 asymptomatic infections estimated as high as 50%, estimating true infection rates remains  
115 challenging.<sup>12,13</sup> Although nucleic acid testing can identify active SARS-CoV-2 cases, most  
116 infections clear within two weeks and leave asymptomatic cases undocumented.<sup>12-14</sup> Antibodies  
117 generated against prior infections can last for months to years.<sup>10,15</sup> The presence of SARS-CoV-  
118 2 antibodies in the blood can indicate that a person was infected at some point in the pandemic.  
119 Serological studies can capture asymptomatic and symptomatic cases, and more accurately  
120 estimate of how many people have been infected with SARS-CoV-2.<sup>10,15</sup> Here, we present the  
121 results of a seroprevalence study of children ages 1–18 years of age who visited hospitals or  
122 regional clinics for non-COVID19-related reasons in the state of Arkansas over the first year of  
123 the COVID-19 pandemic.

124

125

## 126 **METHODS**

127 **Human specimens.** All human specimens were obtained with oversight from the UAMS  
128 Institutional Review Board (IRB), and waiver of consent and HIPAA applied. Remnants of serum  
129 samples collected for routine, non-COVID-19-related clinical laboratory tests were obtained from  
130 Arkansas Children's Hospital (ACH, Little Rock, AR), Arkansas Children's Northwest  
131 (Springdale, AR), and UAMS Family Medical Centers (Ft. Smith, AR and Pine Bluff, AR).  
132 Samples were de-identified prior to testing. Inclusion criteria were ages 1–18 years and  
133 Arkansas resident. Samples were excluded with the following diagnosis codes:  
134 immunodeficiency (primary immune deficiency (D80–D89)), transplant recipient (codes  
135 beginning with Z94), and cancer (C00–D49). Samples from patients receiving chemotherapy  
136 (prior two months), steroids (prior 30 days), and/or intravenous immunoglobulin (prior 6 months)  
137 were excluded. Samples were selected by pathologists at each clinic after they were considered  
138 remnant. Clinical and demographic variables were stored in a secure REDCap database<sup>16,17</sup>  
139 and included age, sex, race, ethnicity, zip code, and county of residence. Metropolitan status  
140 was determined by cross-referencing zip codes with the Federal Office of Rural Health Policy  
141 (FORHP) data files identifying non-metropolitan counties and rural census tracts.

142 **Protein production and purification.** HEK 293T cells were cultured in Dulbecco's  
143 minimum essential media (DMEM; Gibco) supplemented with 10% heat-inactivated calf serum  
144 (CS, VWR), 2 mM L-glutamine (Invitrogen), and 100 U/mL penicillin/100 µg/mL streptomycin  
145 (Invitrogen). Briefly, 15 cm dishes seeded with  $9 \times 10^6$  cells on the preceding day were  
146 transfected with 20 µg of pCAGGS-SARS-CoV-2 Wuhan-Hu-1 RBD with C-terminal 6-His tag  
147 (BEI Resources), pCAGGS SARS-CoV-2 Wuhan-Hu-1 ectodomain Spike glycoprotein gene  
148 with C-terminal 6-His tag, or pCMV3 2019-nCoV nucleoprotein with C-terminal 6-His tag (Sino  
149 Biological) using polyethylamine (PEI) at a 1:3 ratio. DNA:PEI mixtures were incubated at RT for  
150 10 mins and added to cells with the media volume reduced to 5 mL/dish. After 4–6 hours, the  
151 media volume was raised to 25 mL. SARS-CoV-2 RBD and Spike ectodomain proteins were

152 purified as described.<sup>18</sup> Nucleoprotein (N) was isolated as described above under denaturing  
153 conditions.<sup>19</sup> Protein concentration was measured by DC Protein Assay (BioRad). Purified  
154 proteins were confirmed by Coomassie and western blot using antigen-specific antibodies and  
155 stored at  $-80^{\circ}\text{C}$ .

156 **ELISAs.** Serum was inactivated at  $56^{\circ}\text{C}$  for 1 h and initially screened by ELISA specific  
157 for the receptor-binding domain (RBD) of the SARS-CoV-2 S protein.<sup>20-26</sup> Commercial anti-RBD  
158 (Sino Biologicals; 1:2500 dilution) and SARS-CoV-2-RT-PCR-positive patient sera (1:50  
159 dilution) served as positive controls. Purified human IgG (Sigma; 1:2500 dilution) and pre-  
160 COVID-19 patient sera (1:50 dilution) served as negative controls. Serum IgM and IgG were  
161 detected using horse-radish peroxidase-conjugated anti-human IgM+IgG (Jackson  
162 ImmunoResearch; diluted 1:5000 in PBS-T + 1% milk) and SureBlue TMB 1-Component  
163 Peroxidase Substrate (SeraCare; 75  $\mu\text{L}$ ). After 5 min, the reaction was terminated using TMB  
164 Stop Solution (SeraCare; 75  $\mu\text{L}$ ). The  $\text{OD}_{450}$  was measured using a FluoStar Omega plate  
165 reader (BMG Labtech). The final  $\text{OD}_{450}$  was calculated by subtracting the mean  $\text{OD}_{450}$  of blank  
166 wells from the mean  $\text{OD}_{450}$  of duplicate samples. The statistical cutoff for RBD binding was  
167 defined as the mean  $\text{OD}_{450}$  + 3 standard deviations of pre-COVID-19 sera.<sup>26</sup>

168 Confirmation RBD-positive specimens was performed using a Four-Antigen Confirmation  
169 Test (FACT) ELISA. An additional 5% of negative sera were randomly selected and tested in  
170 parallel. Plates were coated with 2  $\mu\text{g}/\text{mL}$  RBD, spike, nucleoprotein, or bovine serum albumin  
171 (BSA; Sigma Aldrich) and FACT ELISA was performed as above. Confirmed positive samples  
172 were defined by (i) a mean signal for any viral antigen over 0.6  $\text{OD}_{450}$ , (ii) BSA-subtracted viral  
173 antigen value  $>0.3 \text{OD}_{450}$ , (iii) and at least two positive antigens (RBD+/Spike+, RBD+/N+,  
174 Spike+/N+, or RBD+/Spike+/N+). The sensitivity and specificity of the assay were 94.6% and  
175 100%, respectively, based on 37 pre-COVID-19 and 19 RT-PCR-confirmed SARS-CoV-2-  
176 positive sera.

177           **Statistical analyses.** The descriptive analysis was conducted for the study population  
178 demographics by wave. SARS-CoV-2 antibody positivity rates were reported with 95%  
179 confidence intervals (CI) using exact binomial distributions. The 2019 U.S. Census Bureau  
180 Arkansas state population estimates (age $\leq$ 18) were used to calculate the standardized positivity  
181 rates.<sup>27</sup> The age- and sex-standardized positivity rates were reported for each wave. Univariable  
182 and multivariable analyses were performed to examine the relationship between variables and  
183 the SARS-CoV-2 antibody positivity rate for each wave. Relative risk was estimated by modified  
184 Poisson regressions with robust error variance as the measure to characterize association  
185 effects.<sup>28</sup> For multivariable analyses, factors being considered were age group, sex, and  
186 race/ethnicity. The statistical significance level was set at 0.05. We conducted all analyses using  
187 SAS version 9.4 (SAS Institute).

188

## 189 **RESULTS**

190           **Enrollment and demographic representation.** We collected 2400 total remnant  
191 pediatric serum samples across five collection periods: Wave 1, April 2–May 6, 2020 (n=316);  
192 Wave 2, June 6–August 10, 2020, (n=300); Wave 3, September 8–October 17, 2020, (n=594);  
193 Wave 4, November 7–December 17, 2020, (n=600); and Wave 5, April 5–April 28, 2021,  
194 (n=590) (Figure 1). Table 1 shows the demographic characteristics for the study. The 1–4 years  
195 age group had the fewest samples (n=328, 13.7%) while the 10–14 years group had the most  
196 samples (n=795, 33.2%). Females represented 54.8% (n=1311), whereas males represented  
197 45.2% (n=1082) of total samples analyzed. The racial/ethnic distribution of the study population  
198 was 55.8% non-Hispanic white (n=1289), 22.5% non-Hispanic black (n=520), and 15.2%  
199 Hispanic (n=351). A total of 151 specimens (6.5%) were collected from patients that did not  
200 identify as white, black, or Hispanic. Most samples were collected from children living in urban  
201 (n=1564, 75.3%) compared to rural areas (n=513, 24.7%). Obesity was the most common co-



202 morbidity reported (n=337, 14.1%), followed by asthma (n=239, 10.0%), diabetes mellitus  
203 (n=113, 4.7%), and hypertension (n=111, 4.6%) (Supplemental table 1).

204 **Estimates of seroprevalence.** Table 2 shows the SARS-CoV-2 seroprevalence rates  
205 by age, sex, and race/ethnicity, and the age- and sex-standardized estimates. The antibody  
206 positivity rate for Wave 1 was 7.9% (95% CI, 4.9%-10.9%), which increased in Wave 2 to 9.7%  
207 (95% CI, 6.3%-13.0%) and Wave 3 to 16.2% (95% CI, 13.2%-19.1%), followed by a slight  
208 decrease to 13.2% (95% CI, 10.5%-15.9%) in Wave 4. The seroprevalence rate was the highest  
209 in Wave 5 at 25.8% (95% CI, 22.2%-29.3%). The overall trend was statistically significant  
210 ( $p < 0.0001$  using the Cochran-Armitage trend test). When standardized to match Arkansas  
211 population demographics,<sup>27</sup> seroprevalence rates followed a similar trend to the non-adjusted  
212 rates, increasing over Waves 1, 2, and 3, with a decrease in Wave 4 and a peak of 24.2% (95%  
213 CI, 22.2%-29.3%) in Wave 5. The 1–4 year-old age group had the highest seroprevalence rates  
214 in Wave 1 (10.7%), Wave 2 (15.2%), and Wave 3 (19.8%), but the lowest in Wave 4 (7.2%) and  
215 Wave 5 (16.0%). The 15-18 year-old group had the highest percentage of reactive specimens in  
216 Wave 4 (14.8%) and 10-14 year-olds were the highest in Wave 5 (30.9%). No statistically-  
217 significant difference was observed between males and females.

218 Hispanics had the highest seroprevalence rate in each wave, reaching a maximum of  
219 43.7% in Wave 5. White persons had a higher seroprevalence rate in Waves 1 and 2, but the  
220 lowest in Waves 3, 4, and 5. Concomitantly, the antibody reactivity rate in black persons was  
221 lower compared to white persons in Waves 1 and 2, but higher in Waves 3, 4, and 5. The  
222 highest seroprevalence rates for white (17.9%) and black (28.2%) children was observed in  
223 Wave 5. Notably, the peak seroprevalence for Hispanic children was 5.5-fold higher compared  
224 to white children and 1.6-fold higher than black children.

225 There was no significant marginal association between age, sex, or metropolitan status  
226 and the likelihood of testing positive for SARS-CoV-2 antibodies (Supplemental table 2).  
227 However, Hispanic and black children were more likely to test positive for antibodies than white

228 children during multiple waves after adjusting for age and sex. Hispanic children showed a  
229 higher relative risk of testing positive compared to white children in Wave 3 (RR 2.82 95% CI,  
230 1.81-4.38), Wave 4 (RR 1.76 95% CI, 1.03-3.00), and Wave 5 (RR 2.37 95% CI 1.69-3.33).  
231 Blacks also showed a higher risk of having antibodies compared to white children in Wave 3  
232 (RR 1.71 95% CI, 1.03-2.84) and Wave 5 (RR 1.59 95% CI, 1.08-2.34). The risk of testing  
233 positive for antibodies was higher for children of other races/ethnicities in Wave 3 (RR 2.59 95%  
234 CI, 1.36-4.92) and Wave 5 (RR 2.14 95% CI, 1.35-3.40).

235 Children with asthma (unadjusted RR 4.83 95% CI, 1.96-11.87;  $P=0.003$ ) or diabetes  
236 (unadjusted RR 4.17 95% CI, 1.49-11.67;  $P=0.007$ ) had higher risk of having antibodies of  
237 SARS-CoV-2 than children who did not have asthma or diabetes in Wave 1 (Supplemental table  
238 3). However, this difference was not observed in the remaining waves. PCR testing was  
239 performed for 714 of 2400 total specimens, with 38 positive PCR tests reported (Supplemental  
240 table 4). A positive RT-PCR test was significantly associated with antibody positivity in Waves 2  
241 through 5 (Supplemental table 5).

242

## 243 **DISCUSSION**

244 Our results demonstrate that by the end of April 2021, approximately 25% of children in  
245 Arkansas had SARS-CoV-2-specific antibodies. This percentage is much higher than the total  
246 number of confirmed cases, which on April 28, 2021 was 11% for the total population of  
247 Arkansas (335,288 positive cases according the Arkansas Department of Health, population of  
248 3,011,524 according to 2019 census data). This finding indicates that those children had been  
249 infected with SARS-CoV-2 and are likely to have at least some natural immunity. Conversely,  
250 our findings suggest that most children in Arkansas have not been infected with SARS-CoV-2  
251 and remain susceptible to infection. Although COVID-19 has been less severe in children than  
252 adults early in the pandemic, emergence of the SARS-CoV-2 delta variant in May 2021 has  
253 driven up infection and hospitalization rates, including among those under 18 years of age.<sup>11,29,30</sup>

254 Developing multisystem inflammatory syndrome in children (MIS-C), a severe inflammatory  
255 disorder that results from a current or recent SARS-CoV-2 infection, is also a risk for those  
256 under 18 years.<sup>31-33</sup> Increased SARS-CoV-2 transmission rates combined with a highly  
257 susceptible pediatric population raises the possibility that SARS-CoV-2 could spread rapidly in  
258 schools and daycares during the upcoming school year. More children infected with SARS-CoV-  
259 2 could lead to an increase in the number of severe COVID-19 and MIS-C cases, and a rise in  
260 pediatric deaths.

261         The first SARS-CoV-2 infections in Arkansas were reported in March 2020 (Figure 1).<sup>34</sup>  
262 Arkansas schools suspended in-person learning on March 15, 2020 and many activities where  
263 children congregate during the summer were closed. We found that the seroprevalence rate in  
264 children increased modestly between spring and summer, suggesting that these protective  
265 measures effectively limited SARS-CoV-2 spread among children in Arkansas. The larger  
266 increase in seroprevalence for September/October (Wave 3), corresponded with the start of the  
267 2020-2021 school year. However, masks and social distancing measures were in place, and  
268 many Arkansas students began the school year as remote learners. These actions likely  
269 reduced SARS-CoV-2 spread in schools, as reported outbreaks were relatively rare. Despite a  
270 dramatic increase in SARS-CoV-2 cases in Arkansas during November and December, the  
271 seroprevalence rate in children dropped during Wave 4.<sup>35</sup> The decrease suggests that  
272 preventative measures in schools were effective at limiting SARS-CoV-2 spread among children  
273 during this time. However, seroprevalence increased sharply in Wave 5 to approximately 25%.  
274 Waves 4 and 5 were approximately three months apart and included the winter holidays, when  
275 children were outside the controlled school setting,  
276 and the corresponding nationwide surge in COVID-19 cases. Our data confirm that the surge  
277 also impacted the pediatric population, correlating with a large increase in the number of SARS-  
278 CoV-2-exposed children.

279 It is well appreciated that underrepresented racial and ethnic groups are  
280 disproportionately affected by the COVID-19 pandemic.<sup>36</sup> We found that Hispanic children were  
281 more likely to have SARS-CoV-2 antibodies compared to white children in all waves. Similarly,  
282 black children were more likely to have antibodies than white children in Wave 3 and Wave 5.  
283 The increase in SARS-CoV-2 antibodies in Hispanic and black children corresponded to an  
284 increase in antibody level in Hispanic and black adults during the same timeframe.(REF-  
285 Kennedy preprint) Higher antibody prevalence in Hispanic and black children may reflect  
286 multiple socioeconomic factors, including income inequality, economic stability, work  
287 circumstances, and housing.<sup>37</sup> Hispanic and black parents may be less likely to hold jobs that  
288 allow them to work remotely, which increases their potential exposure to SARS-CoV-2 in the  
289 workplace and limits their ability to utilize remote learning or in home childcare to decrease their  
290 children's SARS-CoV-2 exposure.<sup>38,39</sup> Residing with parents with a higher risk of workplace  
291 SARS-CoV-2 exposure combined with increased school/daycare attendance could drive  
292 infection rates in minority children. Our results underscore that the pandemic exacerbated  
293 existing racial and ethnic disparities.

294 Our data also highlight the importance of vaccinating children against SARS-CoV-2.  
295 General vaccinations in Arkansas began in January 2021 for those over 18 years and, and were  
296 expanded to 16 years and older on March 30, 2021.<sup>40</sup> The CDC's Advisory Committee on  
297 Immunization Practices recommended the Pfizer-BioNTech vaccine for 12-15 year-olds on May  
298 10, 2021.<sup>40</sup> Wave 5 samples were collected in April 2021, after the expansion of vaccinations to  
299 those 16 years and up but prior to inclusion of 12-15 year-olds. Only 8 of 145 total 16-18 year-  
300 olds in reported being vaccinated during Wave 5 and no subjects reported full vaccination at  
301 least two weeks prior to sample collection. Thus, our data reflect the pediatric seroprevalence  
302 rate in Arkansas prior to widespread vaccination efforts in children and adolescents. As  
303 authorization to vaccinate children younger than 12 years will not occur until late 2021, our  
304 findings indicate that most children in Arkansas remain susceptible to SARS-CoV-2 infection

305 entering the 2021–2022 school year. Importantly, we found that the seroprevalence rate in  
306 younger children was lower than for older children and adolescents, which strongly emphasizes  
307 the ongoing risk of infection for a vulnerable part of the population that cannot yet be  
308 vaccinated. This is a critical consideration for policy makers as more infectious variants emerge  
309 that exhibit increased infection and likelihood of causing severe disease in younger portions of  
310 the population.

### 311 **Limitations**

312 Remnant serum samples may not provide an accurate representation of the Arkansas  
313 population. The strengths and limitations of convenience samples are described elsewhere.<sup>41</sup>  
314 As our study samples were collected from health clinics, our sampling method may favor  
315 subjects who were more ill or more willing to seek health care. It is possible that our  
316 seroprevalence rates are overestimated due to potential cross reactivity between SARS-CoV-2  
317 antigens and seasonal coronaviruses.<sup>42</sup> Some uninfected individuals, particularly children and  
318 adolescents, have antibodies that react with the SARS-CoV-2 Spike protein.<sup>42</sup> Further, we  
319 measured a combination of IgM and IgG antibody isotypes, as opposed to testing solely for  
320 IgG.<sup>43</sup> Although studies indicate that IgG and IgM responses to SARS-CoV-2 can develop  
321 simultaneously, some individuals develop detectable IgM and IgG antibodies at different  
322 times.<sup>44,45</sup> Consequently, we may identify individuals that developed IgM and/or IgG, whereas  
323 other assays may only identify specimens with IgG. Moreover, IgM can be more non-specific  
324 than IgG.<sup>46</sup> Together, these limitations may cause an overestimation of antibody reactivity.  
325 However, inclusion of multiple SARS-CoV-2 antigens and the BSA control limit the number of  
326 non-specific reactions detected in our assay.

327

### 328 **CONCLUSIONS**

329 Analysis of remnant samples collected from children and adolescents in Arkansas  
330 demonstrate a steady increase in SARS-CoV-2 infection during the first 8 months of the

331 pandemic, followed by a more rapid increase to 25% by the end of April 2021. This finding is  
332 notable, as it is more than twice the number of confirmed SARS-CoV-2 diagnoses in the state  
333 on the final collection date. No obvious comorbidities were identified for seropositivity in  
334 children. Racial and ethnic disparities exist, with Hispanic and black children being at increased  
335 risk for SARS-CoV-2 infection compared to white children. We conclude that SARS-CoV-2  
336 infections in children are more common than previously recognized. With the emergence of  
337 SARS-CoV-2 variants, recognition of long-term effects of SARS-CoV-2 even after mild or  
338 asymptomatic infections, and the lack of an authorized pediatric SARS-CoV-2 vaccine, these  
339 results highlight the importance of including children in SARS-CoV-2 public health, clinical care,  
340 and research strategies. Until vaccines are approved for those under 12 years, it is important  
341 that protective measures are enacted, particularly in settings where children are grouped  
342 together, to limit the risk of infection, super-spreader events, severe disease, long-term  
343 sequelae, and death. This is especially true in states like Arkansas with low vaccination rates,  
344 which is currently experiencing a new surge in infections and hospitalizations in younger age-  
345 groups caused by more infectious SARS-CoV-2 variants.

346

## 347 **ACKNOWLEDGMENTS**

348 This research was supported by funds from the state of Arkansas through the  
349 Coronavirus Aid, Relief, and Economic Security (CARES) Act, the UAMS Time-Sensitive  
350 COVID-10 Research Award Program, the UAMS Translational Research Institute  
351 (UL1TR000039, TL1TR003109, and UL1TR003107), and the Center for Microbial Pathogenesis  
352 and Host Inflammatory Response (P20 GM103625).

353

354 **FIGURE LEGENDS**

355 **Figure 1** Timeline of Arkansas COVID-19 milestones and sample collection waves. The  
356 schematic shows the timeline for relevant study-related events. The sample collection periods  
357 are indicated by blue boxes. The seroprevalence rate for each wave is indicated as the percent  
358 (95% CI).

359 **Author Contributions:** Drs. Boehme, Forrest, and Kennedy had full access to all of the data in  
360 the study and take responsibility for the integrity of the data and the accuracy of the analysis.

361

362 *Study concept and design:* Boehme, Forrest, Kennedy, Snowden

363

364 *Acquisition, analysis or interpretation of the data:* Boehme, Boyanton, Caid, Forrest, Owens,

365 Kennedy, Kirkpatrick, Kothari, Kouassi, Mann, Modi, Paredes, Putt, Zohoori

366

367 *Draft of the manuscript:* Boehme, Forrest, Kennedy, Owens

368

369 *Critical revision of the manuscript for important intellectual content:* Boehme, Forrest, James,

370 Kennedy, Owens, Snowden

371

372 *Statistical analysis:* Jin, Du

373

374 *Obtained funding:* Boehme, Forrest, James, Kennedy

375

376 *Administrative, technical, or material support:* Boehme, Boyanton, Forrest, James, Kennedy,

377 Snowden



## 378 REFERENCES

- 379 1. Lu H, Stratton CW, Tang YW. Outbreak of pneumonia of unknown etiology in wuhan,  
380 china: The mystery and the miracle. *J Med Virol.* 2020;92(4):401-402.
- 381 2. Zhu N, Zhang D, Wang W, et al. A novel coronavirus from patients with pneumonia in  
382 china, 2019. *N Engl J Med.* 2020;382(8):727-733.
- 383 3. World health organization. *WHO Coronavirus Dashboard* <https://covid19.who.int/>.
- 384 4. Team CC-R, Jorden MA, Rudman SL, et al. Evidence for limited early spread of covid-19  
385 within the united states, january-february 2020. *MMWR Morb Mortal Wkly Rep.*  
386 2020;69(22):680-684.
- 387 5. United states centers for disease control and prevention. *COVID Data Tracker*  
388 <https://covid.cdc.gov/covid-data-tracker/#datatracker-home>.
- 389 6. Holshue ML, DeBolt C, Lindquist S, et al. First case of 2019 novel coronavirus in the  
390 united states. *N Engl J Med.* 2020;382(10):929-936.
- 391 7. Jean-Baptiste CO, Herring RP, Beeson WL, Dos Santos H, Banta JE. Stressful life  
392 events and social capital during the early phase of covid-19 in the u.S. *Soc Sci Humanit*  
393 *Open.* 2020;2(1):100057.
- 394 8. Bayham J, Fenichel EP. Impact of school closures for covid-19 on the us health-care  
395 workforce and net mortality: A modelling study. *Lancet Public Health.* 2020;5(5):e271-  
396 e278.
- 397 9. Hobbs CV, Drobeniuc J, Kittle T, et al. Estimated sars-cov-2 seroprevalence among  
398 persons aged <18 years - mississippi, may-september 2020. *MMWR Morb Mortal Wkly*  
399 *Rep.* 2021;70(9):312-315.
- 400 10. Bajema KL, Wiegand RE, Cuffe K, et al. Estimated sars-cov-2 seroprevalence in the us  
401 as of september 2020. *JAMA Intern Med.* 2021;181(4):450-460.
- 402 11. Dong Y, Mo X, Hu Y, et al. Epidemiology of covid-19 among children in china. *Pediatrics.*  
403 2020;145(6).
- 404 12. Oran DP, Topol EJ. Prevalence of asymptomatic sars-cov-2 infection. *Ann Intern Med.*  
405 2021;174(2):286-287.
- 406 13. Oran DP, Topol EJ. The proportion of sars-cov-2 infections that are asymptomatic : A  
407 systematic review. *Ann Intern Med.* 2021;174(5):655-662.
- 408 14. United states centers for disease control and prevention. *CDC Diagnostic Tests for*  
409 *COVID-19* <https://www.cdc.gov/coronavirus/2019-ncov/lab/testing.html>.
- 410 15. Havers FP, Reed C, Lim T, et al. Seroprevalence of antibodies to sars-cov-2 in 10 sites  
411 in the united states, march 23-may 12, 2020. *JAMA Intern Med.* 2020.
- 412 16. Harris PA, Taylor R, Thielke R, Payne J, Gonzalez N, Conde JG. Research electronic  
413 data capture (redcap)--a metadata-driven methodology and workflow process for  
414 providing translational research informatics support. *J Biomed Inform.* 2009;42(2):377-  
415 381.
- 416 17. Harris PA, Taylor R, Minor BL, et al. The redcap consortium: Building an international  
417 community of software platform partners. *J Biomed Inform.* 2019;95:103208.
- 418 18. Stadlbauer D, Amanat F, Chromikova V, et al. Sars-cov-2 seroconversion in humans: A  
419 detailed protocol for a serological assay, antigen production, and test setup. *Curr Protoc*  
420 *Microbiol.* 2020;57(1):e100.
- 421 19. Mark J, Li X, Cyr T, Fournier S, Jaentschke B, Hefford MA. Sars coronavirus: Unusual  
422 lability of the nucleocapsid protein. *Biochem Biophys Res Commun.* 2008;377(2):429-  
423 433.
- 424 20. Leclercq I, Batejat C, Burguiere AM, Manuguerra JC. Heat inactivation of the middle east  
425 respiratory syndrome coronavirus. *Influenza Other Respir Viruses.* 2014;8(5):585-586.
- 426 21. Yunoki M, Urayama T, Yamamoto I, Abe S, Ikuta K. Heat sensitivity of a sars-associated  
427 coronavirus introduced into plasma products. *Vox Sang.* 2004;87(4):302-303.

- 428 22. Rabenau HF, Cinatl J, Morgenstern B, Bauer G, Preiser W, Doerr HW. Stability and  
429 inactivation of sars coronavirus. *Med Microbiol Immunol*. 2005;194(1-2):1-6.
- 430 23. Kariwa H, Fujii N, Takashima I. Inactivation of sars coronavirus by means of povidone-  
431 iodine, physical conditions and chemical reagents. *Dermatology*. 2006;212 Suppl 1:119-  
432 123.
- 433 24. Duan SM, Zhao XS, Wen RF, et al. Stability of sars coronavirus in human specimens  
434 and environment and its sensitivity to heating and uv irradiation. *Biomed Environ Sci*.  
435 2003;16(3):246-255.
- 436 25. Chang L, Yan Y, Wang L. Coronavirus disease 2019: Coronaviruses and blood safety.  
437 *Transfus Med Rev*. 2020;34(2):75-80.
- 438 26. Amanat F, Stadlbauer D, Strohmeier S, et al. A serological assay to detect sars-cov-2  
439 seroconversion in humans. *Nat Med*. 2020;26(7):1033-1036.
- 440 27. United states census bureau. *Quickfacts: Arkansas 2021*;  
441 <https://www.census.gov/quickfacts/AR>. Accessed May 14, 2021.
- 442 28. Zou G. A modified poisson regression approach to prospective studies with binary data.  
443 *Am J Epidemiol*. 2004;159(7):702-706.
- 444 29. Havers FP, Whitaker M, Self JL, et al. Hospitalization of adolescents aged 12-17 years  
445 with laboratory-confirmed covid-19 - covid-net, 14 states, march 1, 2020-april 24, 2021.  
446 *MMWR Morb Mortal Wkly Rep*. 2021;70(23):851-857.
- 447 30. Dougherty K, Mannell M, Naqvi O, Matson D, Stone J. Sars-cov-2 b.1.617.2 (delta)  
448 variant covid-19 outbreak associated with a gymnastics facility - oklahoma, april-may  
449 2021. *MMWR Morb Mortal Wkly Rep*. 2021;70(28):1004-1007.
- 450 31. Dufort EM, Koumans EH, Chow EJ, et al. Multisystem inflammatory syndrome in  
451 children in new york state. *N Engl J Med*. 2020;383(4):347-358.
- 452 32. Feldstein LR, Rose EB, Horwitz SM, et al. Multisystem inflammatory syndrome in u.S.  
453 Children and adolescents. *N Engl J Med*. 2020;383(4):334-346.
- 454 33. Ouldali N, Yang DD, Madhi F, et al. Factors associated with severe sars-cov-2 infection.  
455 *Pediatrics*. 2021;147(3).
- 456 34. James A, Eagle L, Phillips C, et al. High covid-19 attack rate among attendees at events  
457 at a church - arkansas, march 2020. *MMWR Morb Mortal Wkly Rep*. 2020;69(20):632-  
458 635.
- 459 35. Arkansas department of health. *COVID-19 Tracker*  
460 <https://experience.arcgis.com/experience/633006d0782b4544bd5113a314f6268a/>.  
461 Accessed July 20, 2021.
- 462 36. Khunti K, Platt L, Routen A, Abbasi K. Covid-19 and ethnic minorities: An urgent agenda  
463 for overdue action. *BMJ*. 2020;369:m2503.
- 464 37. United states bureau of labor statistics. *Labor force characteristics by race and ethnicity,*  
465 *2019* <https://www.bls.gov/opub/reports/race-and-ethnicity/2019/home.htm>. Accessed  
466 July 22, 2021.
- 467 38. Yancy CW. Covid-19 and african americans. *JAMA*. 2020;323(19):1891-1892.
- 468 39. Ambrose AJH. Inequities during covid-19. *Pediatrics*. 2020;146(2).
- 469 40. Arkansas pharmacists association. *COVID Vaccine 2021*; [https://www.arrx.org/covid-](https://www.arrx.org/covid-vaccine)  
470 [vaccine](https://www.arrx.org/covid-vaccine). Accessed May 30, 2021.
- 471 41. Shook-Sa BE, Boyce RM, Aiello AE. Estimation without representation: Early severe  
472 acute respiratory syndrome coronavirus 2 seroprevalence studies and the path forward.  
473 *J Infect Dis*. 2020;222(7):1086-1089.
- 474 42. Ng KW, Faulkner N, Cornish GH, et al. Preexisting and de novo humoral immunity to  
475 sars-cov-2 in humans. *Science*. 2020;370(6522):1339-1343.
- 476 43. Oved K, Olmer L, Shemer-Avni Y, et al. Multi-center nationwide comparison of seven  
477 serology assays reveals a sars-cov-2 non-responding seronegative subpopulation.  
478 *EClinicalMedicine*. 2020;29:100651.

- 479 44. Long QX, Liu BZ, Deng HJ, et al. Antibody responses to sars-cov-2 in patients with  
480 covid-19. *Nat Med.* 2020;26(6):845-848.
- 481 45. Long QX, Tang XJ, Shi QL, et al. Clinical and immunological assessment of  
482 asymptomatic sars-cov-2 infections. *Nat Med.* 2020;26(8):1200-1204.
- 483 46. Shah J, Liu S, Potula HH, et al. Igg and igm antibody formation to spike and  
484 nucleocapsid proteins in covid-19 characterized by multiplex immunoblot assays. *BMC*  
485 *Infect Dis.* 2021;21(1):325.
- 486

487

488  
489

**Table 1. Demographics of sampled populations in Arkansas during 5 periods of SARS-CoV-2 antibody testing from April 2, 2020 to April 28, 2021.**

| Number (%) <sup>a</sup>          |                          |                             |                                   |                                   |                             |                                   |
|----------------------------------|--------------------------|-----------------------------|-----------------------------------|-----------------------------------|-----------------------------|-----------------------------------|
| Characteristic                   | Wave 1<br>(n = 316)      | Wave 2<br>(n = 300)         | Wave 3<br>(n = 594)               | Wave 4<br>(n = 600)               | Wave 5<br>(n = 590)         | Overall<br>(N = 2400)             |
| Collection dates                 | April 2 –<br>May 6, 2020 | June 6 –<br>August 10, 2020 | September 8 –<br>October 17, 2020 | November 7 –<br>December 17, 2020 | April 5 –<br>April 28, 2021 | April 2, 2020 –<br>April 28, 2021 |
| Age category                     |                          |                             |                                   |                                   |                             |                                   |
| 1-4 years                        | 56 (17.7)                | 33 (11)                     | 81 (13.6)                         | 83 (13.9)                         | 75 (12.8)                   | 328 (13.7)                        |
| 5-9 years                        | 61 (19.3)                | 75 (25)                     | 112 (18.9)                        | 116 (19.5)                        | 142 (24.2)                  | 506 (21.1)                        |
| 10-14 years                      | 90 (28.5)                | 98 (32.7)                   | 205 (34.5)                        | 214 (36.0)                        | 188 (32)                    | 795 (33.2)                        |
| 15-18 years                      | 109 (34.5)               | 94 (31.3)                   | 196 (33)                          | 182 (30.6)                        | 183 (31.1)                  | 764 (31.9)                        |
| Sex                              |                          |                             |                                   |                                   |                             |                                   |
| Female                           | 161 (50.9)               | 155 (51.7)                  | 324 (54.5)                        | 338 (56.8)                        | 333 (56.5)                  | 1311 (54.8)                       |
| Male                             | 155 (49.1)               | 145 (48.3)                  | 270 (45.5)                        | 257 (43.2)                        | 255 (43.2)                  | 1082 (45.2)                       |
| Race/Ethnicity                   |                          |                             |                                   |                                   |                             |                                   |
| White                            | 178 (56.5)               | 154 (52.2)                  | 327 (57.2)                        | 312 (54.5)                        | 318 (57.2)                  | 1289 (55.8)                       |
| Black                            | 91 (28.9)                | 53 (18.0)                   | 117 (20.5)                        | 150 (26.2)                        | 109 (19.6)                  | 520 (22.5)                        |
| Hispanic                         | 28 (8.9)                 | 64 (21.7)                   | 95 (16.6)                         | 77 (13.4)                         | 87 (15.7)                   | 351 (15.2)                        |
| Other                            | 18 (5.7)                 | 24 (8.1)                    | 33 (5.8)                          | 34 (5.9)                          | 42 (7.6)                    | 151 (6.5)                         |
| Metropolitan status <sup>b</sup> |                          |                             |                                   |                                   |                             |                                   |
| Urban                            | Not Reported             | 251 (83.7)                  | 458 (77.1)                        | 424 (71.3)                        | 431 (73.3)                  | 1564 (75.3)                       |
| Rural                            | Not Reported             | 49 (16.3)                   | 136 (22.9)                        | 171 (28.7)                        | 157 (26.7)                  | 513 (24.7)                        |

<sup>a</sup>Percentages calculated from non-missing values for all periods. Missing values in Wave 1 included race/ethnicity (n=1) and metropolitan status (n=316). Missing values in Wave 2 included race/ethnicity (n=5). Missing values in Wave 3 included race/ethnicity (n=22). Missing values in Wave 4 included age category (n=5), sex (n=5), race/ethnicity (n=27), and metropolitan status (n=5). Missing values in Wave 5 included age category (n=4), sex (n=2), race/ethnicity (n=34), and metropolitan status (n=2).

490  
491  
492  
493  
494

495  
496

**Table 2. Age-specific, sex-specific, race/ethnicity-specific seroprevalence estimates in Arkansas during 5 periods of SARS-CoV-2 antibody testing from April 2, 2020 to April 28, 2021.**

| Characteristic                                                          | Persons reactive, % (95% CI) (No.) |                          |                                |                                |                          |
|-------------------------------------------------------------------------|------------------------------------|--------------------------|--------------------------------|--------------------------------|--------------------------|
|                                                                         | Wave 1<br>(n = 316)                | Wave 2<br>(n = 300)      | Wave 3<br>(n = 594)            | Wave 4<br>(n = 600)            | Wave 5<br>(n = 590)      |
| Collection dates                                                        | April 2 – May 6, 2020              | June 6 – August 10, 2020 | September 8 – October 17, 2020 | November 7 – December 17, 2020 | April 5 – April 28, 2021 |
| Age category                                                            |                                    |                          |                                |                                |                          |
| 1-4 years                                                               | 10.7 (2.4-19.1) (6)                | 15.2 (2.2-28.1) (5)      | 19.8 (10.9-28.6) (16)          | 7.2 (1.54-12.9) (6)            | 16.0 (7.5-24.5) (12)     |
| 5-9 years                                                               | 4.9 (0.0-10.5) (3)                 | 8.0 (1.7, 14.3) (6)      | 18.8 (11.4-26.1) (21)          | 12.9 (6.7-19.1) (15)           | 19.0 (12.5,-25.5) (27)   |
| 10-14 years                                                             | 8.9 (2.9-14.9) (8)                 | 11.2 (4.9-17.6) (11)     | 14.2 (9.3-19.0) (29)           | 14.0 (9.3-18.7) (30)           | 30.9 (24.2-37.5) (58)    |
| 15-18 years                                                             | 7.3 (1.4-12.3) (8)                 | 7.4 (2.0-12.9) (7)       | 15.3 (10.2-20.4) (30)          | 14.8 (9.6-20.0) (27)           | 29.5 (22.8-36.2) (54)    |
| Sex                                                                     |                                    |                          |                                |                                |                          |
| Female                                                                  | 8.7 (4.3-13.1) (14)                | 9.0 (4.5-13.6) (14)      | 17.3 (13.1-21.4) (56)          | 13.6 (9.9-17.3) (46)           | 27.0 (22.2-31.8) (90)    |
| Male                                                                    | 7.1 (3.0-11.2) (11)                | 10.3 (5.3-15.4) (15)     | 14.8 (10.6-19.1) (40)          | 12.5 (8.4-16.5) (32)           | 23.9 (18.7-29.2) (61)    |
| Race/Ethnicity                                                          |                                    |                          |                                |                                |                          |
| White                                                                   | 9.0 (4.7-13.2) (16)                | 9.7 (5.0-14.5) (15)      | 10.7 (7.3-14.1) (35)           | 11.5 (8.0-15.1) (36)           | 17.9 (13.7-22.2) (57)    |
| Black                                                                   | 5.5 (0.7-10.3) (5)                 | 3.8 (0.0-9.1) (2)        | 17.1 (10.2-24.0) (20)          | 15.3 (9.5-21.2) (23)           | 28.4 (19.8-37.0) (31)    |
| Hispanic                                                                | 10.7 (0.0-22.9) (3)                | 14.1 (5.3-22.8) (9)      | 29.5 (20.1-38.8) (28)          | 20.8 (11.5-30.0) (16)          | 43.7 (33.0-54.3) (38)    |
| Other                                                                   | 5.6 (0.0 -7.3) (1)                 | 12.5 (0.0-26.8) (3)      | 27.3 (11.2-43.4) (9)           | 2.9 (0.0-8.9) (1)              | 35.7 (20.6-50.8) (15)    |
| Total                                                                   | 7.9 (4.9-10.9) (25)                | 9.7 (6.3-13.0) (29)      | 16.2 (13.2-19.1) (96)          | 13.2 (10.5-15.9) (79)          | 25.8 (22.2-29.3) (152)   |
| Age- and sex-Standardized seroprevalence rate <sup>a</sup> , % (95% CI) | 8.6 (5.1-12.1)                     | 9.8 (6.1-13.6)           | 16.9 (13.3-20.6)               | 12.5 (9.6-15.5)                | 24.2 (20.1-28.2)         |

497  
498

<sup>a</sup>Standardized positivity rates were calculated based on the 2019 U.S. Census Bureau Arkansas state population estimates (age ≤ 18).<sup>27</sup>

499 **Table 3. Age- and sex-adjusted association with SARS-CoV-2 antibody positivity by time period.**

| Adjusted RR (95% CI) |                          |                             |                                   |                                   |                             |
|----------------------|--------------------------|-----------------------------|-----------------------------------|-----------------------------------|-----------------------------|
| Characteristic       | Wave 1<br>(n = 316)      | Wave 2<br>(n = 300)         | Wave 3<br>(n = 594)               | Wave 4<br>(n = 600)               | Wave 5<br>(n = 592)         |
| Collection dates     | April 2 –<br>May 6, 2020 | June 6 –<br>August 10, 2020 | September 8 –<br>October 17, 2020 | November 7 –<br>December 17, 2020 | April 5 –<br>April 28, 2021 |
| Age category         |                          |                             |                                   |                                   |                             |
| 1-4 years            | 1.66 (0.55-5.02)         | 1.89 (0.67-5.35)            | 1.41 (0.82-2.43)                  | 0.62 (0.26-1.45)                  | 0.50 (0.28-0.90)            |
| 5-9 years            | 0.65 (0.18-2.41)         | 0.97 (0.34-2.74)            | 1.46 (0.88-2.41)                  | 0.95 (0.52-1.75)                  | 0.72 (0.47-1.09)            |
| 10-14 years          | 1.23 (0.46-3.29)         | 1.36 (0.54-3.43)            | 0.95 (0.59-1.53)                  | 1.04 (0.64-1.68)                  | 0.90 (0.66-1.24)            |
| 15-18 years          | Ref                      | Ref                         | Ref                               | Ref                               | Ref                         |
| Sex                  |                          |                             |                                   |                                   |                             |
| Female               | 1.37 (0.61-3.06)         | 0.88 (0.44-1.75)            | 1.04 (0.71-1.52)                  | 1.12 (0.73-1.73)                  | 1.06 (0.80-1.40)            |
| Male                 | Ref                      | Ref                         | Ref                               | Ref                               | Ref                         |
| Race/Ethnicity       |                          |                             |                                   |                                   |                             |
| Black                | 0.59 (0.23-1.54)         | 0.41 (0.09-1.83)            | 1.71 (1.03-2.84)                  | 1.31 (0.80-2.14)                  | 1.59 (1.08-2.34)            |
| Hispanic             | 1.21 (0.37-3.93)         | 1.53 (0.70-3.37)            | 2.82 (1.81-4.38)                  | 1.76 (1.03-3.00)                  | 2.37 (1.69-3.33)            |
| Other                | 0.54 (0.07-4.36)         | 1.25 (0.41-3.81)            | 2.59 (1.36-4.92)                  | 0.25 (0.04-1.80)                  | 2.14 (1.35-3.40)            |
| White                | Ref                      | Ref                         | Ref <sup>a</sup>                  | Ref                               | Ref <sup>a</sup>            |

<sup>a</sup>Indicates P value < 0.0001 for race/ethnicity in the statistical model.

500  
501

502 **Supplemental table 1. Co-morbidities of sampled populations in Arkansas during 5 periods of SARS-CoV-2 antibody testing**  
 503 **from April 2, 2020 to April 29, 2021.**

| Characteristic                          | Number (%) <sup>a</sup> |                          |                                |                                |                          |                                |
|-----------------------------------------|-------------------------|--------------------------|--------------------------------|--------------------------------|--------------------------|--------------------------------|
|                                         | Wave 1<br>(n = 316)     | Wave 2<br>(n = 300)      | Wave 3<br>(n = 594)            | Wave 4<br>(n = 600)            | Wave 5<br>(n = 590)      | Overall<br>(N = 2400)          |
| Collection dates                        | April 2 – May 6, 2020   | June 6 – August 10, 2020 | September 8 – October 17, 2020 | November 7 – December 17, 2020 | April 5 – April 28, 2021 | April 2, 2020 – April 28, 2021 |
| Respiratory viral panel within 6 months | Not Reported            | 34 (11.3)                | 35 (5.9)                       | 25 (4.2)                       | Not reported             | 94 (6.3)                       |
| Asthma                                  | 12 (3.8)                | 31 (10.3)                | 68 (11.5)                      | 62 (10.4)                      | 66 (11.2)                | 239 (10.0)                     |
| Hypertension                            | 16 (5.1)                | 16 (5.3)                 | 25 (4.2)                       | 34 (5.7)                       | 20 (3.4)                 | 111 (4.6)                      |
| Obesity                                 | 14 (4.4)                | 46 (15.3)                | 83 (14.0)                      | 109 (18.3)                     | 85 (14.4)                | 337 (14.1)                     |
| Diabetes                                | 10 (3.2)                | 15 (5.0)                 | 30 (5.1)                       | 27 (4.5)                       | 31 (5.3)                 | 113 (4.7)                      |
| Autoimmune disease                      | Not Reported            | 7 (2.3)                  | 14 (2.4)                       | 19 (3.2)                       | 23 (3.9)                 | 63 (3.0)                       |

504 <sup>a</sup> Percentages calculated from non-missing values for all periods. Missing values in Wave 1 included respiratory virus panel performed within 6 months (n = 316) and autoimmune  
 505 disease (n = 316), Missing values in Wave 4 included respiratory virus panel performed within 6 months (n = 5), asthma (n = 5), hypertension (n = 5), obesity (n = 5), diabetes (n = 5),  
 506 and autoimmune disease (n = 5). Missing values in Wave 5 included Respiratory viral panel within 6 months (n = 590).  
 507  
 508  
 509

510  
511  
512

**Supplemental table 2. Marginal association between SARS-CoV-2 antibody positivity and demographic characteristics by time period.**

| Characteristic <sup>a</sup> | Wave 1<br>(n = 316) |                   |                | Wave 2<br>(n = 300) |                   |                | Wave 3<br>(n = 594) |                   |                | Wave 4<br>(n = 600) |                   |                | Wave 5<br>(n = 590) |                   |                |
|-----------------------------|---------------------|-------------------|----------------|---------------------|-------------------|----------------|---------------------|-------------------|----------------|---------------------|-------------------|----------------|---------------------|-------------------|----------------|
|                             | No., (%)            | RR (95% CI)       | P <sup>b</sup> | No., (%)            | RR (95%CI)        | P <sup>b</sup> | No., (%)            | RR (95% CI)       | P <sup>b</sup> | No., (%)            | RR (95% CI)       | P <sup>b</sup> | No., (%)            | RR (95% CI)       | P <sup>b</sup> |
| Total                       | 25 (7.9)            |                   |                | 29 (9.7)            |                   |                | 96 (16.2)           |                   |                | 79 (13.2)           |                   |                | 152 (25.8)          |                   |                |
| Age category                |                     |                   | 0.690          |                     |                   | 0.539          |                     |                   | 0.560          |                     |                   | 0.410          |                     |                   | 0.001          |
| 1-4                         | 6 (10.7)            | 1.46 (0.53-4.00)  |                | 5 (15.2)            | 2.03 (0.69-5.97)  |                | 16 (19.8)           | 1.29 (0.75-2.23)  |                | 6 (7.2)             | 0.49 (0.21-1.14)  |                | 12 (16.0)           | 0.54 (0.31-0.95)  |                |
| 5-9                         | 3 (4.9)             | 0.67 (0.18-2.43)  |                | 6 (8.0)             | 1.07 (0.38-3.06)  |                | 21 (18.8)           | 1.23 (0.74-2.03)  |                | 15 (12.9)           | 0.87 (0.48-1.57)  |                | 27 (19.0)           | 0.64 (0.43-0.97)  |                |
| 10-14                       | 8 (8.9)             | 1.21 (0.47-3.10)  |                | 11 (11.2)           | 1.51 (0.61-3.72)  |                | 29 (14.2)           | 0.92 (0.58-1.48)  |                | 30 (14.0)           | 0.95 (0.58-1.53)  |                | 58 (30.9)           | 1.05 (0.77-1.43)  |                |
| 15-18                       | 8 (7.3)             | Ref               |                | 7 (7.5)             | Ref               |                | 30 (15.3)           | Ref               |                | 27 (14.8)           | Ref               |                | 54 (29.5)           | Ref               |                |
| Sex                         |                     |                   | 0.600          |                     |                   | 0.701          |                     |                   | 0.417          |                     |                   | 0.679          |                     |                   | 0.332          |
| Female                      | 14 (8.7)            | 1.23 (0.57, 2.62) |                | 14 (9.0)            | 0.87 (0.44, 1.74) |                | 56 (17.3)           | 1.17 (0.80, 1.69) |                | 46 (13.6)           | 1.09 (0.72, 1.67) |                | 90 (27.0)           | 1.13 (0.85, 1.50) |                |
| Male                        | 11 (7.1)            | Ref               |                | 15 (10.3)           | Ref               |                | 40 (14.8)           | Ref               |                | 32 (12.5)           | Ref               |                | 61 (23.9)           | Ref               |                |
| Race/ethnicity              |                     |                   | 0.706          |                     |                   | 0.352          |                     |                   | <0.0001        |                     |                   | 0.060          |                     |                   | 0.001          |
| Black                       | 5 (5.5)             | 0.61 (0.23-1.62)  |                | 2 (3.8)             | 0.39 (0.09-1.64)  |                | 20 (17.1)           | 1.60 (0.96-2.65)  |                | 23 (15.3)           | 1.33 (0.82-2.16)  |                | 31 (28.4)           | 1.59 (1.09-2.32)  |                |
| Hispanic                    | 3 (10.7)            | 1.19 (0.37-3.83)  |                | 9 (14.1)            | 1.44 (0.67-3.13)  |                | 28 (29.5)           | 2.75 (1.77-4.28)  |                | 16 (20.8)           | 1.80 (1.06-3.07)  |                | 38 (43.7)           | 2.44 (1.74-3.41)  |                |
| Others                      | 1 (5.6)             | 0.62 (0.09-4.39)  |                | 3 (12.5)            | 1.28 (0.40-4.10)  |                | 9 (27.3)            | 2.55 (1.34-4.83)  |                | 1 (2.9)             | 0.25 (0.04-1.80)  |                | 15 (35.7)           | 1.99 (1.25-3.18)  |                |
| White                       | 16 (9.0)            | Ref               |                | 15 (9.7)            | Ref               |                | 35 (10.7)           | Ref               |                | 36 (11.5)           | Ref               |                | 57 (17.9)           | Ref               |                |
| Metropolitan status         |                     |                   | NA             |                     |                   | 0.091          |                     |                   | 0.602          |                     |                   | 0.876          |                     |                   | 0.001          |
| Urban                       | NA                  | NA                |                | 28 (11.2)           | 5.47 (0.76-39.24) |                | 76 (16.6)           | 1.13 (0.72-1.78)  |                | 55 (13.0)           | 0.96 (0.61-1.52)  |                | 101 (23.4)          | 0.74 (0.55-0.98)  |                |
| Rural                       |                     |                   |                | 1 (2.0)             | Ref               |                | 20 (14.7)           | Ref               |                | 23 (13.5)           | Ref               |                | 50 (31.9)           | Ref               |                |

<sup>a</sup> Missing values from Table 1 were not included in the analysis.

<sup>b</sup> P-value indicates whether the positivity differs between the category of a respective variable.

513  
514  
515  
516



517  
518

**Supplemental table 3. Marginal association between SARS-CoV-2 antibody positivity and comorbidities by time period.**

| Characteristic <sup>a</sup>                | Wave 1<br>(n = 316) |                   |                | Wave 2<br>(n = 300) |                  |                | Wave 3<br>(n = 594) |                  |                | Wave 4<br>(n = 600) |                  |                | Wave 5<br>(n = 590) |                  |                |
|--------------------------------------------|---------------------|-------------------|----------------|---------------------|------------------|----------------|---------------------|------------------|----------------|---------------------|------------------|----------------|---------------------|------------------|----------------|
|                                            | No., (%)            | RR (95% CI)       | P <sup>b</sup> | No., (%)            | RR (95%CI)       | P <sup>b</sup> | No., (%)            | RR (95% CI)      | P <sup>b</sup> | No., (%)            | RR (95% CI)      | P <sup>b</sup> | No., (%)            | RR (95% CI)      | P <sup>b</sup> |
| Total                                      | 25 (7.9)            |                   |                | 29 (9.7)            |                  |                | 96 (16.2)           |                  |                | 79 (13.2)           |                  |                | 152 (25.8)          |                  |                |
| Respiratory virus panel<br>within 6 months |                     |                   |                |                     |                  | 0.090          |                     |                  | 0.517          |                     |                  |                |                     |                  |                |
| Yes                                        | NA                  | NA                | NA             | 6 (17.7)            | 2.04 (0.89-4.65) |                | 7 (20.0)            | 1.26 (0.63-2.50) |                | 0                   | NA               | NA             | NA                  | NA               | NA             |
| No                                         |                     |                   |                | 23 (8.7)            | Ref              |                | 89 (15.9)           | Ref              |                | 78 (13.7)           |                  |                |                     |                  |                |
| Asthma                                     |                     |                   | 0.003          |                     |                  | 0.192          |                     |                  | 0.099          |                     |                  | 0.231          |                     |                  | 0.71           |
| Yes                                        | 4 (33.3)            | 4.83 (1.96-11.87) |                | 5 (16.1)            | 1.81 (0.74-4.40) |                | 6 (8.8)             | 0.52 (0.23-1.13) |                | 5 (8.1)             | 0.59 (0.25-1.40) |                | 16 (24.2)           | 0.93 (0.60-1.47) |                |
| No                                         | 21 (6.9)            | Ref               |                | 24 (8.9)            | Ref              |                | 90 (17.1)           | Ref              |                | 73 (13.7)           | Ref              |                | 136 (26.0)          | Ref              |                |
| Hypertension                               |                     |                   | NA             |                     |                  | 0.643          |                     |                  | 0.258          |                     |                  | 0.775          |                     |                  | 0.31           |
| Yes                                        | 0                   | NA                |                | 1 (6.3)             | 0.63 (0.09-4.37) |                | 6 (24.0)            | 1.52 (0.74-3.13) |                | 5 (14.7)            | 1.13 (0.49-2.61) |                | 7 (35.0)            | 1.38 (0.74-2.54) |                |
| No                                         | 25 (8.3)            |                   |                | 28 (9.9)            | Ref              |                | 90 (15.8)           | Ref              |                | 73 (13.0)           | Ref              |                | 145 (25.4)          | Ref              |                |
| Obesity                                    |                     |                   | 0.914          |                     |                  | 0.763          |                     |                  | 0.607          |                     |                  | 0.589          |                     |                  | 0.96           |
| Yes                                        | 1 (7.1)             | 0.90 (0.13-6.18)  |                | 5 (10.9)            | 1.15 (0.46-2.86) |                | 15 (18.1)           | 1.14 (0.69-1.88) |                | 16 (14.7)           | 1.15 (0.69-1.91) |                | 20 (23.5)           | 0.90 (0.60-1.36) |                |
| No                                         | 24 (8.0)            | Ref               |                | 24 (9.5)            | Ref              |                | 81 (15.9)           | Ref              |                | 62 (12.8)           | Ref              |                | 132 (26.1)          | Ref              |                |
| Diabetes                                   |                     |                   | 0.007          |                     |                  | NA             |                     |                  | 0.938          |                     |                  | 0.391          |                     |                  | 0.96           |
| Yes                                        | 3 (30.0)            | 4.17 (1.49-11.67) |                | 0                   | NA               |                | 5 (16.7)            | 1.03 (0.45-2.35) |                | 2 (7.4)             | 0.55 (0.14-2.14) |                | 12 (38.7)           | 1.55 (0.97-2.46) |                |
| No                                         | 22 (7.2)            | Ref               |                | 29 (10.2)           |                  |                | 91 (16.1)           | Ref              |                | 76 (13.4)           | Ref              |                | 140 (25.0)          | Ref              |                |
| Autoimmune disease                         |                     |                   | NA             |                     |                  | 0.670          |                     |                  | 0.849          |                     |                  | 0.739          |                     |                  | 0.96           |
| Yes                                        | NA                  | NA                |                | 1 (14.3)            | 1.49 (0.24-9.49) |                | 2 (14.3)            | 0.88 (0.24-3.22) |                | 2 (10.5)            | 0.80 (0.21-3.01) |                | 7 (30.4)            | 1.19 (0.63-2.24) |                |
| No                                         |                     |                   |                | 28 (9.6)            | Ref              |                | 94 (16.2)           | Ref              |                | 76 (13.2)           | Ref              |                | 145 (25.6)          | Ref              |                |

<sup>a</sup>Missing values from Table 1 were not included in the analysis.

<sup>b</sup>P-value indicates whether the positivity differs between the category of a respective variable.

517  
518  
519  
520  
521  
522

523 **Supplemental table 4. PCR test history and results from sampled populations in Arkansas during 5 periods of SARS-CoV-2**  
 524 **antibody testing from April 2, 2020 to April 28, 2021.**

| Number (%) <sup>a</sup>             |                          |                             |                                   |                                   |                             |                                   |
|-------------------------------------|--------------------------|-----------------------------|-----------------------------------|-----------------------------------|-----------------------------|-----------------------------------|
| Characteristic                      | Wave 1<br>(n = 316)      | Wave 2<br>(n = 300)         | Wave 3<br>(n = 594)               | Wave 4<br>(n = 600)               | Wave 5<br>(n = 590)         | Overall<br>(N = 2400)             |
| Collection dates                    | April 2 –<br>May 6, 2020 | June 6 –<br>August 10, 2020 | September 8 –<br>October 17, 2020 | November 7 –<br>December 17, 2020 | April 5 –<br>April 28, 2021 | April 2, 2020 –<br>April 28, 2021 |
| SARS-CoV-2 RT-PCR test administered |                          |                             |                                   |                                   |                             |                                   |
| Yes                                 | 64 (20.3)                | 82 (27.3)                   | 160 (26.9)                        | 173 (29.1)                        | 235 (39.8)                  | 714 (29.8)                        |
| No                                  | 252 (79.7)               | 218 (72.7)                  | 434 (73.1)                        | 422 (70.9)                        | 355 (60.2)                  | 1681 (70.2)                       |
| SARS-CoV-2 RT-PCR test result       |                          |                             |                                   |                                   |                             |                                   |
| Positive                            | 0 (0.0)                  | 1 (1.2)                     | 6 (3.8)                           | 11 (6.4)                          | 20 (8.6)                    | 38 (5.3)                          |
| Negative                            | 64 (100)                 | 81 (98.8)                   | 154 (96.2)                        | 162 (93.6)                        | 214 (91.5)                  | 675 (94.7)                        |

<sup>a</sup> Percentages calculated from non-missing values for all periods. Missing values in Wave 1 included SARS-CoV-2 RT-PCR test result (n = 252). Missing values in Wave 2 included SARS-CoV-2 RT-PCR test result (n = 218). Missing values in Wave 3 included SARS-CoV-2 RT-PCR test result (n = 434). Missing values in Wave 4 included SARS-CoV-2 RT-PCR test administered (n = 5) and SARS-CoV-2 RT-PCR test result (n = 427). Missing values in Wave 5 included SARS-CoV-2 PCR test result (n = 356)

525  
 526  
 527  
 528  
  
 529  
 530

531  
532  
533

**Supplemental table 5. Marginal association between SARS-CoV-2 antibody positivity and SARS-CoV-2 PCR testing by time period.**

| Characteristic <sup>a</sup> | Wave 1<br>(n = 316) |                  |                | Wave 2<br>(n = 300) |                   |                | Wave 3<br>(n = 594) |                  |                | Wave 4<br>(n = 600) |                   |                | Wave 5<br>(n = 590) |                  |                |
|-----------------------------|---------------------|------------------|----------------|---------------------|-------------------|----------------|---------------------|------------------|----------------|---------------------|-------------------|----------------|---------------------|------------------|----------------|
|                             | No., (%)            | RR (95% CI)      | P <sup>b</sup> | No., (%)            | RR (95%CI)        | P <sup>b</sup> | No., (%)            | RR (95% CI)      | P <sup>b</sup> | No., (%)            | RR (95% CI)       | P <sup>b</sup> | No., (%)            | RR (95% CI)      | P <sup>b</sup> |
| Total                       | 25 (7.9)            |                  |                | 29 (9.7)            |                   |                | 96 (16.2)           |                  |                | 79 (13.2)           |                   |                | 152 (25.8)          |                  |                |
| COVID-19 test administered  |                     |                  | 0.585          |                     |                   | 0.178          |                     |                  | 0.589          |                     |                   | 0.655          |                     |                  | 0.485          |
| Yes                         | 4 (6.3)             | 0.75 (0.27-2.11) |                | 11 (13.4)           | 1.62 (0.80-3.29)  |                | 28 (17.5)           | 1.12 (0.75-1.67) |                | 21 (12.1)           | 0.90 (0.56-1.44)  |                | 57 (24.3)           | 0.91 (0.68-1.20) |                |
| No                          | 21 (8.3)            | Ref              |                | 18 (8.3)            | Ref               |                | 68 (15.7)           | Ref              |                | 57 (13.5)           | Ref               |                | 95 (26.8)           | Ref              |                |
| COVID-19 PCR result         |                     |                  |                |                     |                   | <0.0001        |                     |                  | <0.0001        |                     |                   | <0.0001        |                     |                  | <0.0001        |
| Positive                    | 0                   | NA               | NA             | 1 (100)             | 8.10 (4.53-14.47) |                | 4 (66.7)            | 4.28 (2.18-8.40) |                | 8 (72.7)            | 9.06 (4.80-17.10) |                | 17 (85.0)           | 4.55 (3.25-6.35) |                |
| Negative                    | 4 (6.3)             |                  |                | 10 (12.4)           | Ref               |                | 24 (15.6)           | Ref              |                | 13 (8.0)            | Ref               |                | 40 (18.7)           | Ref              |                |

<sup>a</sup> Missing values from Table 1 were not included in the analysis.

<sup>b</sup> P-value indicates whether the positivity differs between the category of a respective variable.

534  
535  
536  
537

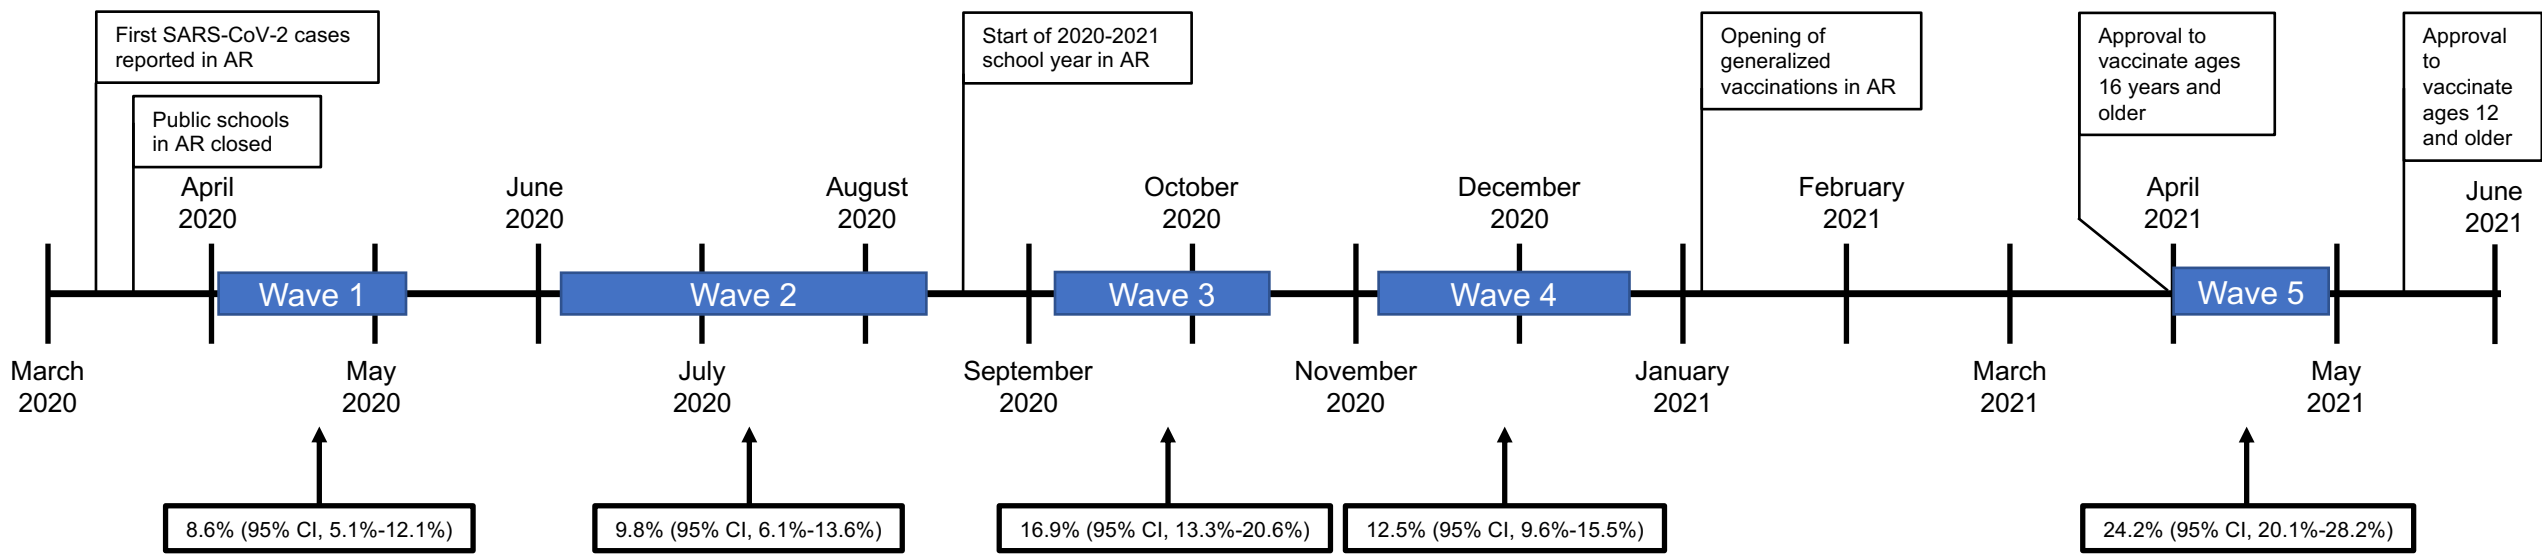

Source: https://medrxiv.org/content/10.1101/2021.08.04.21261592v1.full.pdf
